# Supplementary material for: High-throughput screen for compounds that modulate neurite growth of human induced pluripotent stem cell-derived neurons
Source: PubMed Central journal article supplement (PMC5894944; doi:10.1242/dmm.031906), 2018-02-01
Supplement: dmm-11-031906-s1.pdf [file dmm-11-031906-s1.pdf]

## Supplementary Figure and Tables

### Figure S1

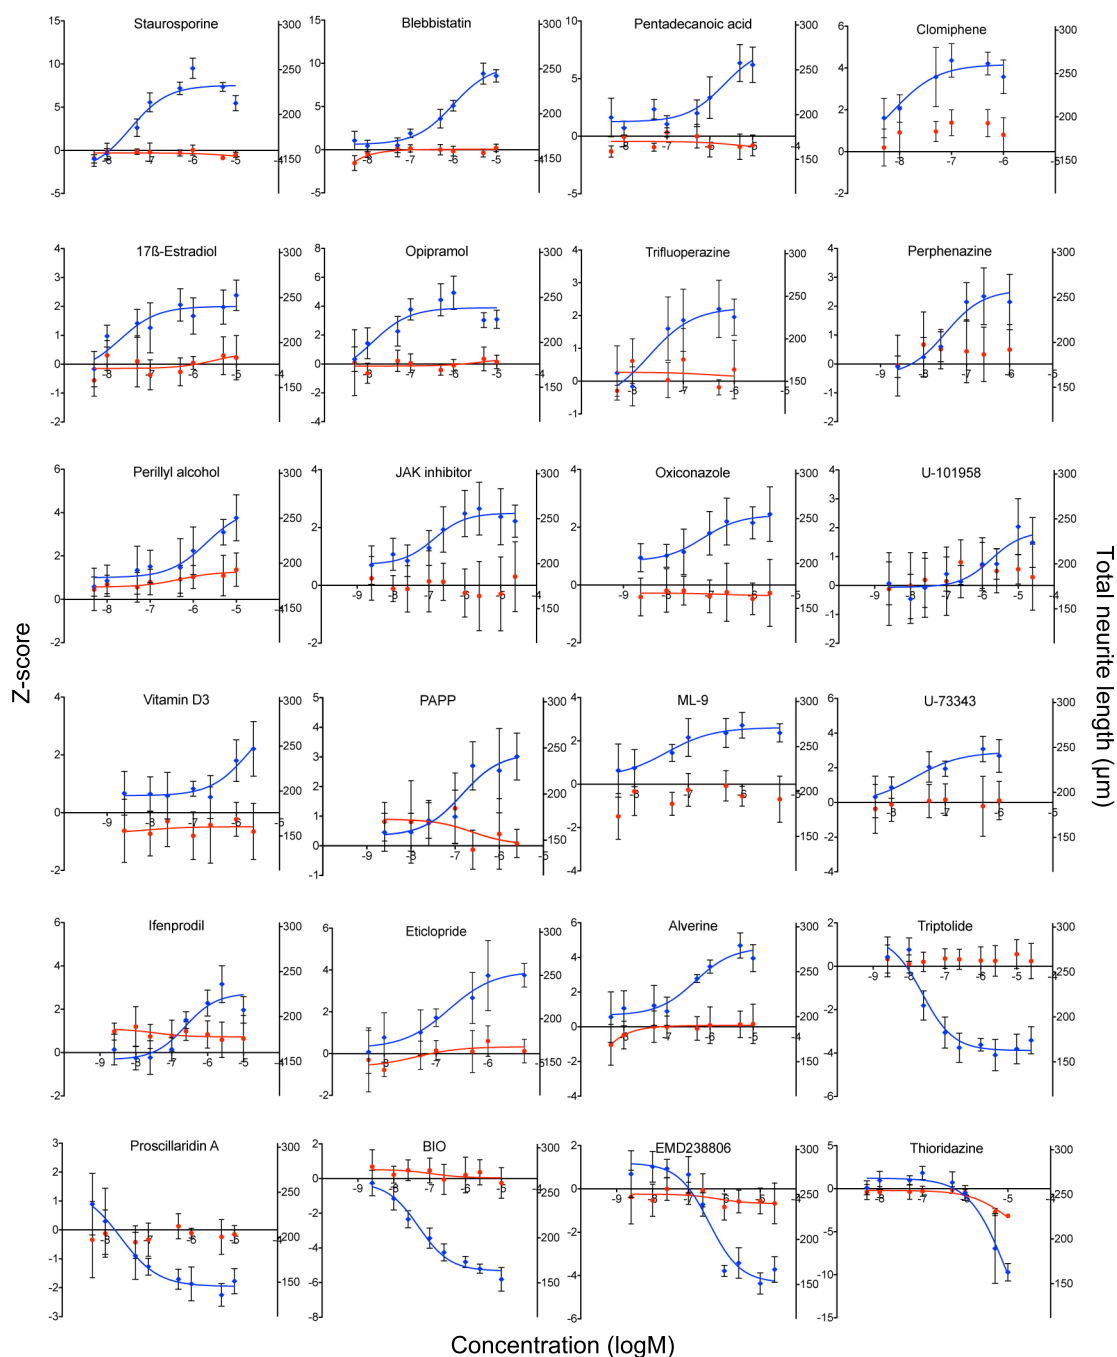

**Figure S1. Additional dose-response curves for confirmed hits**

Effects on neurite growth (blue: total neurite length) were confirmed at concentrations without negative effects on the number of viable cells (red). Data shown as mean Z-score  $\pm$ SD, n=6 wells (mean: 244 cells/well). Total neurite length ( $\mu\text{m}$ ) corresponding to Z-scores is shown on the right of each curve for reference.

**Table S1. Immunofluorescence reagents**

[Click here to Download Table S1](#)

**Table S2. Primary screen results for cytotoxic compounds**

For each compound, the Z-score presented is the average of two duplicates. The Z-score presented is the largest Z-score chosen from the four measured nuclear parameters (Number of nuclei, Nucleus area, Nucleus intensity, & Nucleus roundness).

[Click here to Download Table S2](#)

**Table S3. Primary screen results for hits promoting neurite outgrowth**

For each compound, the Z-score presented is the average of two duplicates at the listed concentration. Compounds that promoted neurite outgrowth at both concentrations tested are listed at each concentration. The Z-score presented is the highest Z-score chosen from the seven measured neurite parameters (Maximum neurite length, Total neurite length, Number of extremities, Number of neurite segments, Number of nodes (type 1), Number of nodes (type 2), & Number of roots).

[Click here to Download Table S3](#)

**Table S4. Primary screen results for hits inhibiting neurite outgrowth**

For each compound, the Z-score presented is the average of two duplicates at the listed concentration. Compounds that inhibited neurite outgrowth without cytotoxic effects at both concentrations tested are listed at each concentration. The Z-score presented is the lowest Z-score chosen from the seven measured neurite parameters (Maximum neurite length, Total neurite length, Number of extremities, Number of neurite segments, Number of nodes (type 1), Number of nodes (type 2), & Number of roots).

[Click here to Download Table S4](#)
